# Supplementary material for: Photochemical aging of aerosol particles in different air masses arriving at Baengnyeong Island, Korea
Source: Copernicus journal article supplement (doi:10.5194/acp-18-6661-2018), 2018-05-09
Supplement: Supplementary file 1 [file acp-18-6661-2018-supplement.pdf]

Supplement of Atmos. Chem. Phys., 18, 6661–6677, 2018  
<https://doi.org/10.5194/acp-18-6661-2018-supplement>  
© Author(s) 2018. This work is distributed under  
the Creative Commons Attribution 3.0 License.

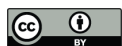

*Supplement of*

## **Photochemical aging of aerosol particles in different air masses arriving at Baengnyeong Island, Korea**

**Eunha Kang et al.**

*Correspondence to:* Meehye Lee (meehye@korea.ac.kr)

The copyright of individual parts of the supplement might differ from the CC BY 3.0 License.

1 S1. The sampling setup of the PAM reactor

2  
3  
4  
5

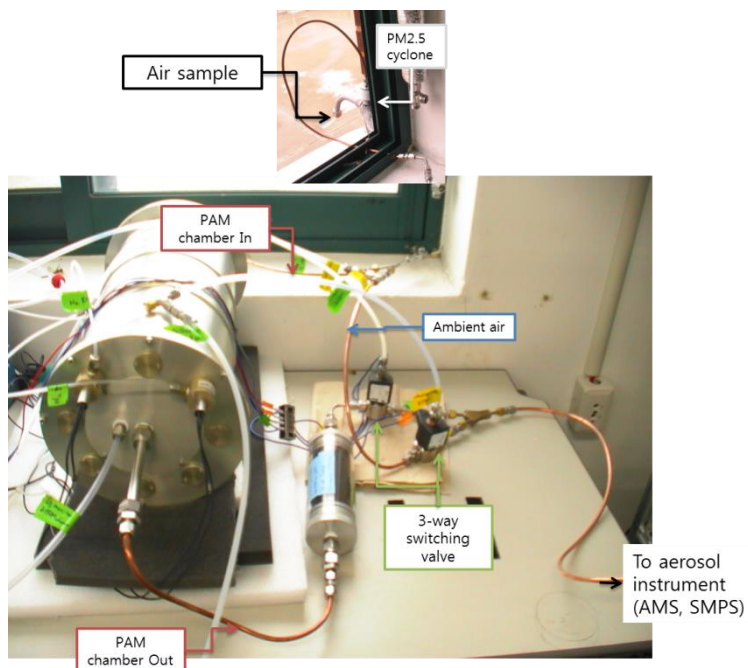

6  
7  
8

[Figure S1. The PAM reactor sampling setup]

9 In our experimental setup, the PAM reactor was installed beside the window in the  
10 laboratory and ambient air was pulled through a copper tubing (~ 30 cm)  
11 cyclone outside the laboratory. The ambient air from the PM2.5 cyclone was introduced  
12 into the PAM reactor through an inlet plate and endcap and then rapidly dispersed  
13 before entering the reactor through a Silconert-coated (Silcotech, Inc.) stainless steel  
14 screen. Aerosol sampling tubes were 1/4 inch OD copper and stainless steel tubes and  
15 gas sampling tubes were 1/4 inch OD PTFE Teflon tubes. The ambient and PAM reactor  
16 through air samples were alternately switched to the aerosol measurement instruments  
17 by using a 3-way switching valve every 6 minute. The 3-way switching valve might cause  
18 the evaporation of ambient and PAM aerosols when it was getting hot during operation.  
19 When PAM aerosol was introduced in the measurement instruments, ambient aerosol was  
20 bypassed to outside and vice versa. The total flow rate to the PAM reactor and ambient

21 sampling was set to 5 liters per minute. We tried to set up the PAM reactor as close as  
22 possible to the PM2.5 cyclone and the AMS/SMPS instruments as shown in the figure  
23 above. The aerosol particles and gases loss due to the PAM reactor and through the tube  
24 surfaces contributes to the mass concentration measurement uncertainty.

25

## 26 S2. The wall loss test

27 We conducted the loss test for 1) ambient aerosol and 2) SO<sub>2</sub> during the experiment in  
28 2011. Its results are discussed below and the LVOCs fate is calculated using the method  
29 in Palm et al. (2016).

30

31 First, PAM reactor was run for ambient air without lamp-on and the SMPS signals of air  
32 entering and exiting the PAM reactor were compared to estimate the physical loss of  
33 aerosol to the wall. In experimental setup, ambient air entering the PAM reactor was  
34 introduced into SMPS alternately with air exiting the PAM reactor. For the test, this cycle  
35 was repeated three times. Because entering and exiting air was not simultaneously  
36 measured, there could be some error caused by the variation of ambient air. However,  
37 there was no detectable variation in ambient air, judged from gaseous concentrations for  
38 less than an hour of test period. The mass of ambient aerosol and aerosol exiting the  
39 PAM reactor (without lamps on) was  $13.1 \pm 2.06 \mu\text{g m}^{-3}$  and  $11.6 \pm 0.46 \mu\text{g m}^{-3}$ ,  
40 respectively, resulting in about 12 % of aerosol mass in the PAM reactor (Figure below).  
41 However, the decrease in mass was due to the loss of pre-existing aerosols but not newly  
42 formed secondary aerosols from condensable gases.

43

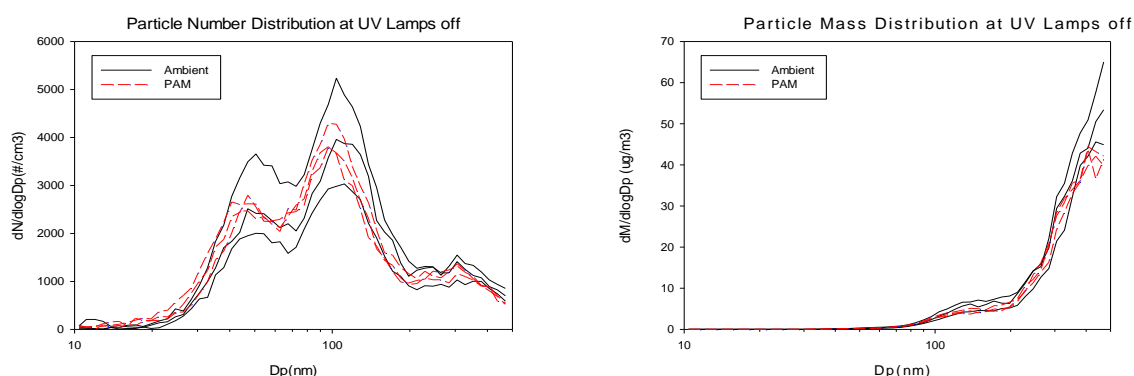

44

45 [Figure S2-1. SMPS particle number distribution (left) and mass distribution (right) for wall  
46 loss test. Red and black color indicate air exiting and entering the PAM reactor.]

47

48 Second, we have tested SO<sub>2</sub> loss by the wall during the experiment. For this test, we used  
49 ambient air instead of standard SO<sub>2</sub> mixtures in a wide range of concentrations. When air  
50 was pulled through the PAM reactor inlet plate, SO<sub>2</sub> was measured first for ambient air in  
51 front of the inlet, and then before it entered and after it exited the PAM reactor (Figure  
52 below). SO<sub>2</sub> concentrations prior to and after the PAM reactor were 3.5 ppbv and 3.1  
53 ppbv, respectively, leading to SO<sub>2</sub> loss of 11 ± 7 %. There was loss in the sampling inlet  
54 line. The detailed information on SO<sub>2</sub> measurement is given below.

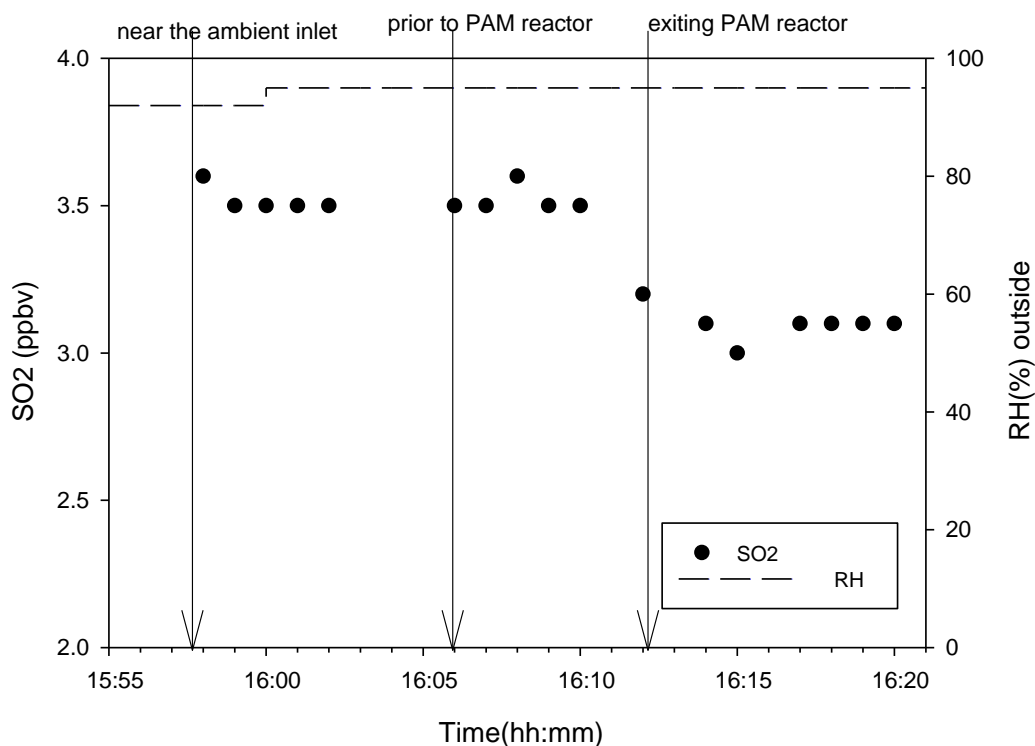

55

56

[Figure S2-2. SO<sub>2</sub> loss test results in PAM reactor]

57

### 58 S3. Calibration of OH exposure in the PAM reactor

59 We used the OH exposure calibration which was done with a mixture of pure air and  
60 SO<sub>2</sub>(g) in the laboratory by Kang et al. (2011a). The full manuscript can be found in J.  
61 KOSAE Vol. 27, No. 5 (2011) pp. 534~544, Journal of Korean Society for Atmospheric  
62 Environment, DOI: <http://dx.doi.org/10.5572/KOSAE.2011.27.5.534>.

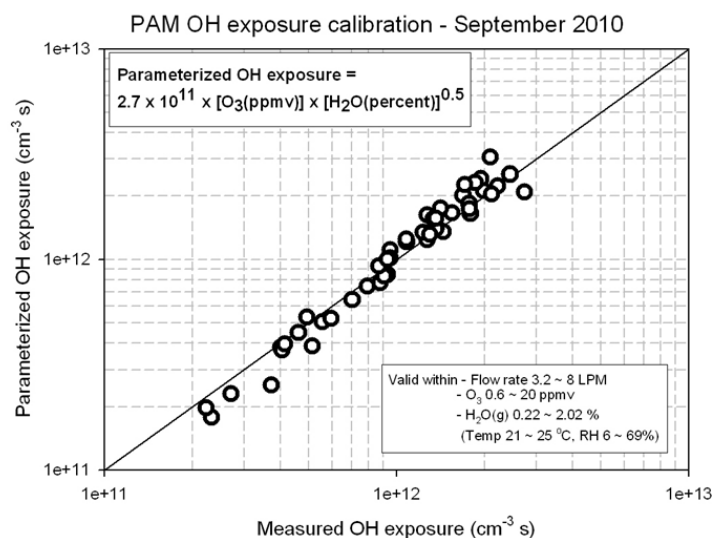

63  
 64 [Figure S3. OH exposure calibration curve for this PAM reactor. (cited from Kang et al.,  
 65 (2011a)]  
 66

67 S4. Comparison between calculated and measured sulfate formation in PAM reactor

68 We calculated the sulfate formation using SO<sub>2</sub> measurements from sampling through and  
 69 bypassing the PAM chamber, assuming that SO<sub>2</sub>(g) was converted to sulfate(p) by  
 70 reaction with OH inside the PAM reactor. For this estimation, we adopted 2 ppbv offset  
 71 for ambient SO<sub>2</sub> measurement, SO<sub>2</sub> gas loss of 11 % in the PAM reactor, and condensable  
 72 sulfate loss by wall and exiting the reactor of about 38%. At 4.6 days of OH exposure, 43%  
 73 of SO<sub>2</sub> will be consumed in the PAM reactor based on  $k_{\text{SO}_2+\text{OH}} = 1 \times 10^{-12} \text{ cm}^3 \text{ molec}^{-1} \text{ s}^{-1}$ .  
 74 The measured SO<sub>4</sub> enhancement was obtained by subtracting the ambient SO<sub>4</sub>  
 75 concentration from the SO<sub>4</sub> concentration measured in PAM chamber. For this  
 76 comparison, AMS measurements were averaged hourly to be consistent with the SO<sub>2</sub>  
 77 measurement. The figure below compares the measured and predicted SO<sub>4</sub> enhancement,  
 78 showing that the measured explained well the expected (slope = 1.16 and an intercept =  
 79 -0.137. We used the total least squares regressions ([http://www.real-  
 80 statistics.com/regression/total-least-squares/](http://www.real-statistics.com/regression/total-least-squares/)), which is minimizing the sum of the squared  
 81 Euclidean distances from the points to the regression line similar to orthogonal distance  
 82 regression. The correlation between the measured and predicted was deteriorated by the  
 83 very low measured SO<sub>4</sub> enhancement against a wide range of sulfate expected to be  
 84 enhanced. Not to mention, uncertainty was involved in the measurement of SO<sub>2</sub>

85 concentration, loss assessment of SO<sub>2</sub> and condensable sulfate, and the AMS  
86 measurement of particles smaller than 50 nm.

87

88

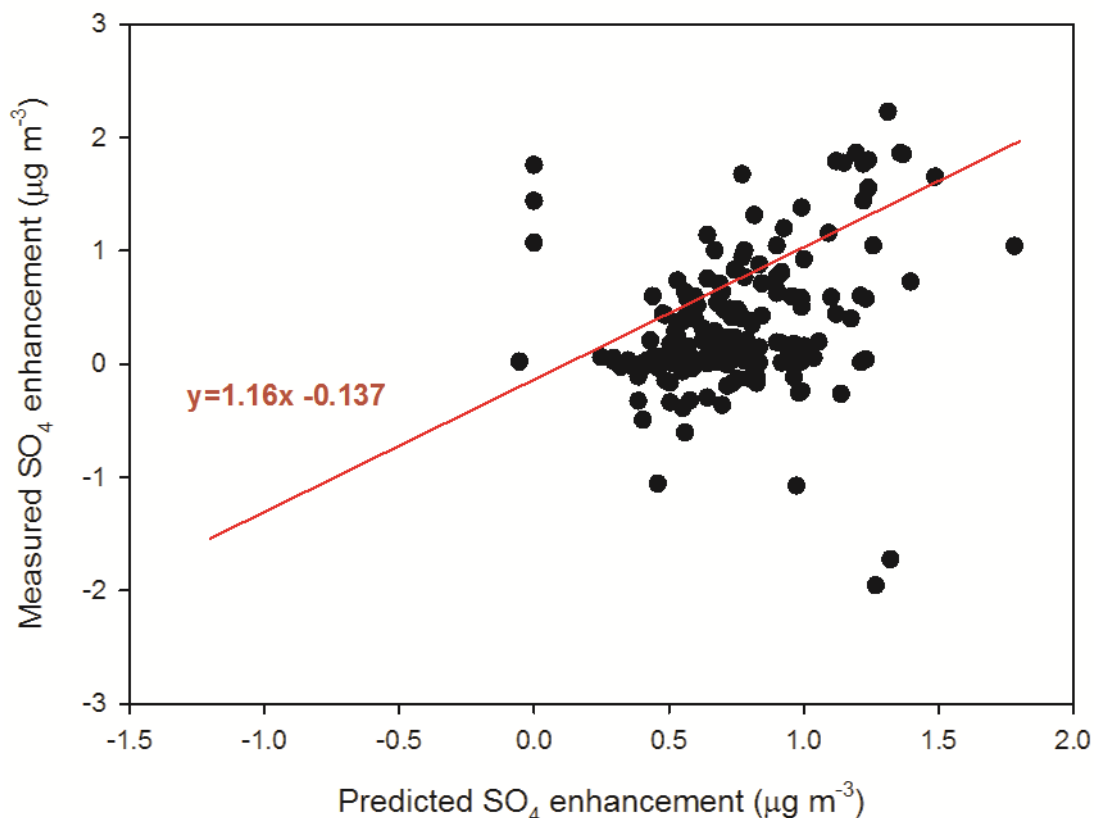

89

90 [Figure S4. Measured SO<sub>4</sub> enhancement vs. calculated SO<sub>4</sub> enhancement.]

91

92

93 S5. Estimating the condensation sink

94 In addition, we estimated the loss of condensable gases by wall deposition, exiting the  
95 reactor, and further OH reaction competing with condensation on existing particles,  
96 based on Palm et al. (2016) and model posted in <https://sites.google.com/site/pamwiki/hardware/estimation-equations>. Although the model calculating the possible loss of  
97 condensable gases was developed a couple of years after this experiment was performed,  
98 the physical setup of our PAM reactor was very similar to the ones used in Palm et al.  
99 (2016), Ortega et al. (2013), and (2016).

100

102 We used the same constants as those in Palm et al. (2016), but for wall loss in our  
103 experiment, we used a measured loss percentage of SO<sub>2</sub> of 11%. A proportion to  
104 condensing on the existing particles (Faerosol denoted in Figure S5) associates to the  
105 condensation sink (CS). The details of aerosol CS calculation were available in a previous  
106 paper (Salimi et al., 2015). Faerosol variation with respect to time was due to the existing  
107 particles concentration variation. About 20~70% of condensable organic gases were  
108 estimated to be condensed on existing particles, contributing to mass increase in PAM  
109 reactor. It is similar to the case of high condensation sink (CS) shown in figure 5 of Palm  
110 et al. (2016). In our study the fraction of low-volatility gases that were not condensed in  
111 the PAM reactor was higher for organic-dominated case (~40%) than sulfate-dominated  
112 case (~30%) because of greater CS in latter than former.

113  
114 For conversion of SO<sub>2</sub> to sulfate, the fraction of additional OH reaction-induced loss was  
115 set to 0 because of no more reactions between SO<sub>2</sub> and OH as described in Palm et al.  
116 (2016). The estimated fraction of sulfate condensation on existing particles was in the  
117 range of 40~90% and the rest were expected to be lost by walls and exit the reactor  
118 without being condensed.

119  
120  
121  
122  
123  
124  
125  
126  
127  
128  
129  
130  
131  
132  
133  
134  
135

136

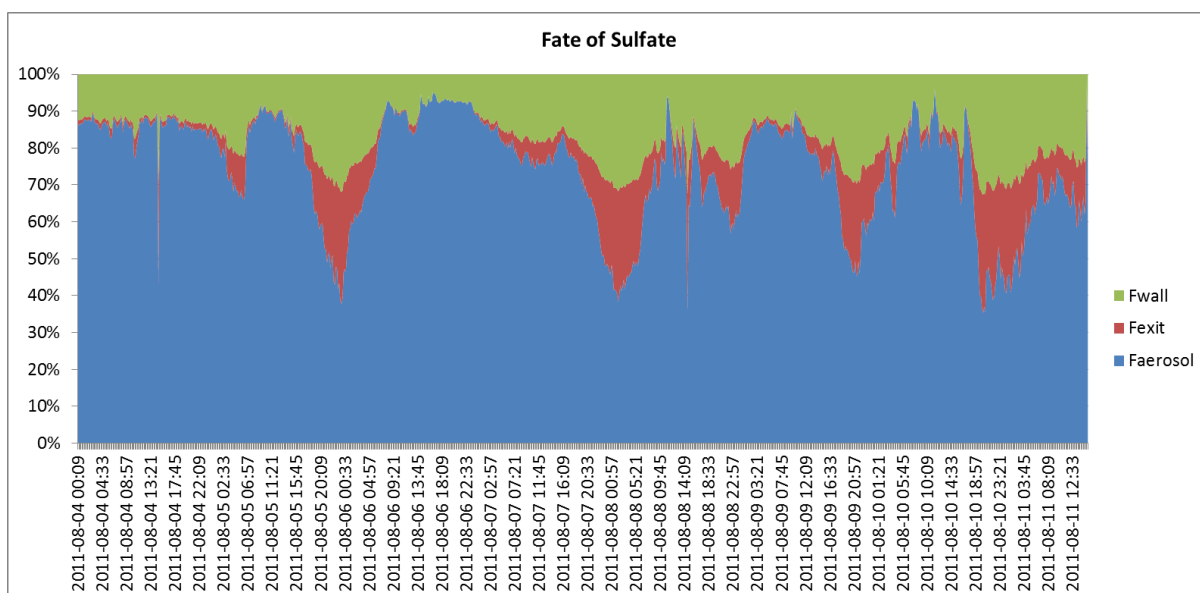

137

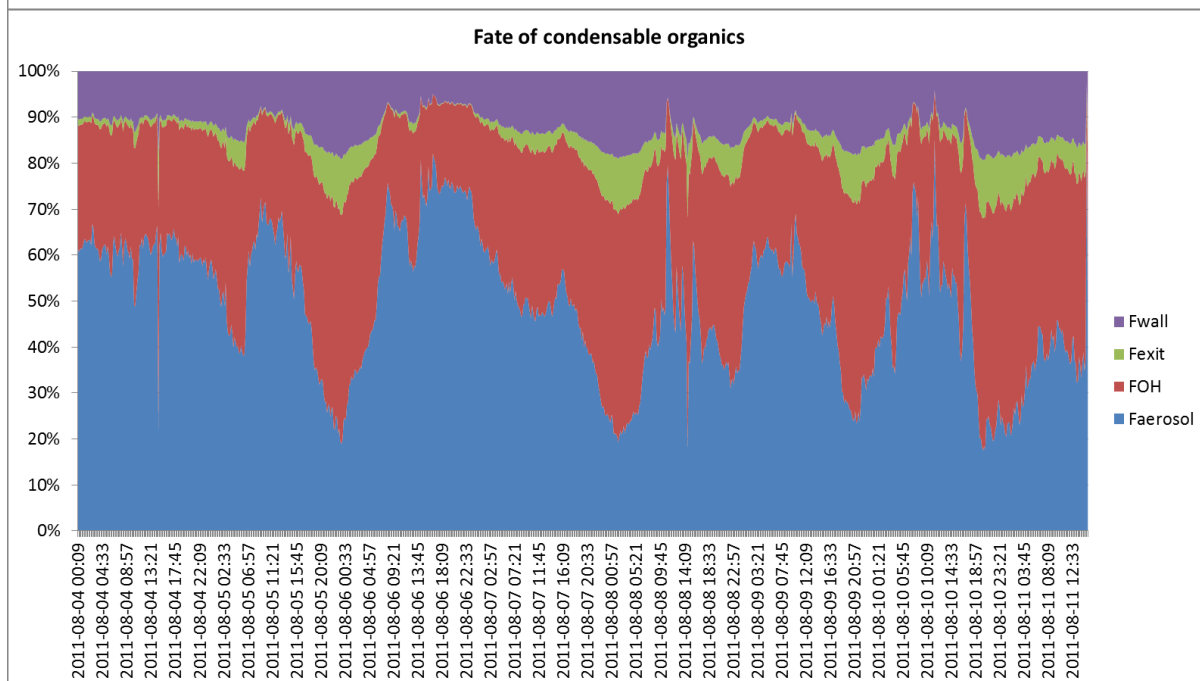

138

139 [Figure S5. Fractional loss of SO<sub>2</sub> (upper) and condensable organics (down) in PAM  
140 reactor]

141

142

S6. Correction of the particle mass concentration in PAM reactor with condensation loss

143 We corrected the particle mass concentration measured in PAM reactor with  
144 condensation loss by the exiting the reactor and the wall. For AMS measurement, we  
145 used a loss of sulfate for sulfate, nitrate, ammonium, and chloride concentration and used



146 a loss of organics for organics concentration. For SMPS measurement, we used a  
147 composition dependent loss  $(\text{organics}/(\text{organics}+\text{inorganics}) * \text{organics}$   
148  $\text{loss} + \text{inorganics}/(\text{organics}+\text{inorganics}) * \text{sulfate loss})$  for the total particle mass  
149 concentration. The figure S6 shows the uncorrected and corrected particle mass  
150 concentration in PAM reactor. The errors are  $2\sigma$  confidence. Note that the correction  
151 range of the particle mass concentrations were mostly overlapped with the error range.  
152

### AMS particle mass concentration loss correction

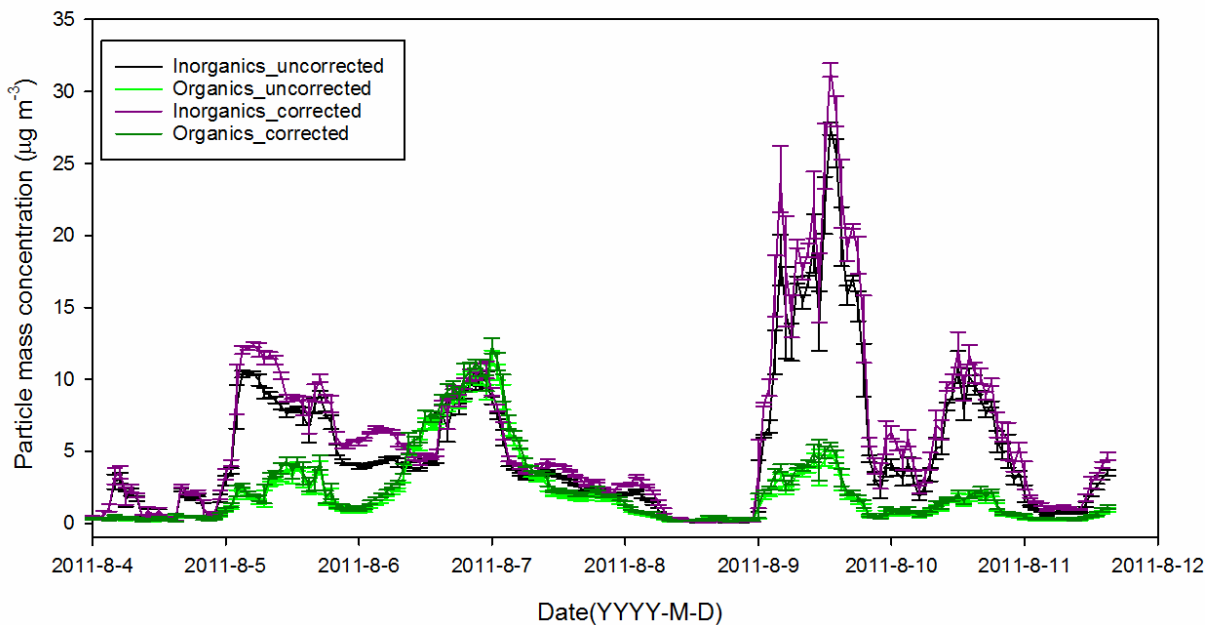

### SMPS particle mass concentration loss correction

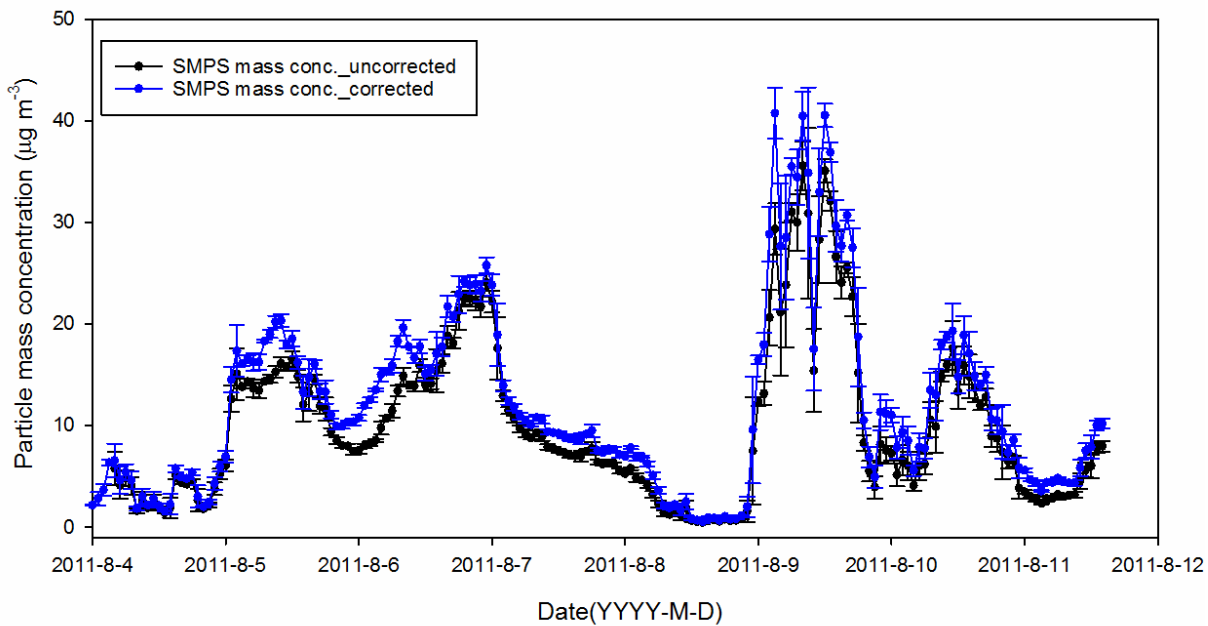

153  
154 [Figure S6. Time series of uncorrected AMS and SMPS particle mass concentration  
155 and corrected particle mass concentration with condensable gases loss. The errors are  $2\sigma$   
156 confidence.]

157  
158

159 S7. A comparison of AMS vs SMPS

160 Aerosol particles volume concentration obtained from AMS and SMPS was compared  
161 each other for ambient and PAM aerosol particles. Particle volume concentration from  
162 SMPS was directly obtained by the SMPS measurement, and particle volume  
163 concentration from AMS was extracted by the measured particle mass concentration  
164 divide by composition dependent density.

165  
166 Figure 2(c) in the manuscript is a time series of AMS and SMPS particle volume  
167 concentration and [Figure S7-1](#) is a scatter plot of AMS and SMPS particle volume  
168 concentration. For ambient aerosol particles, the AMS and SMPS particle volume  
169 concentrations agree to within measurement uncertainties, but for the PAM aerosol  
170 particles, the SMPS volume concentration was greater than AMS volume concentration by  
171 a factor of 1.6. While this difference can be explained by the measurement uncertainties  
172 of the two instruments, it is also possible that elemental carbon and soil particles are  
173 being detected by the SMPS but not by the AMS. In ambient aerosol particles data for  
174 the organics-dominated episode, the AMS volume concentration was slightly greater than  
175 or similar to that of the SMPS, but in sulfate dominated episode, AMS volume  
176 concentration was smaller than that of the SMPS.

177

178

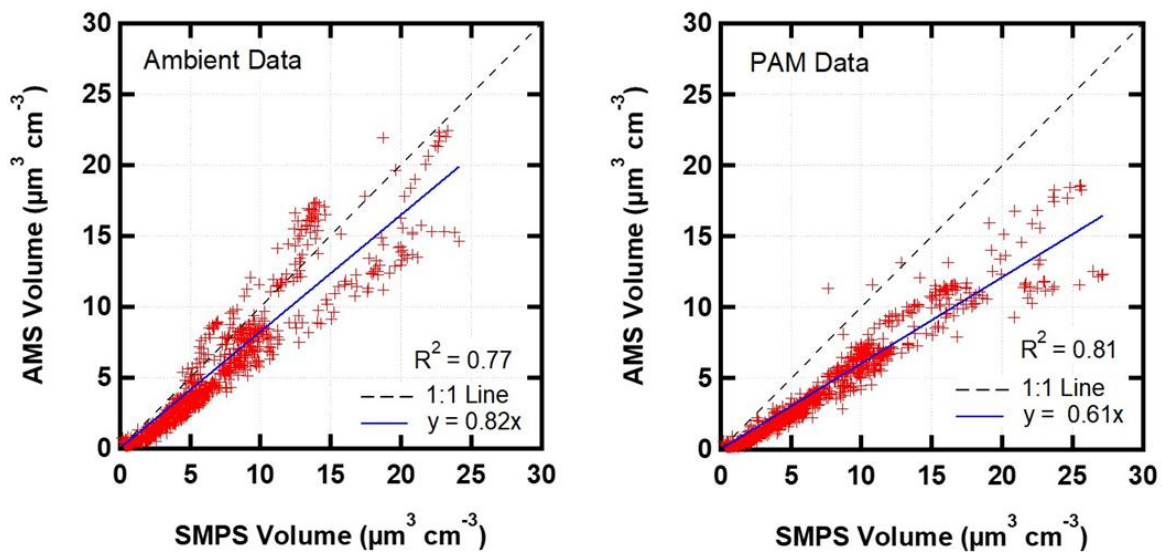

179  
 180 [Figure S7-1. Scatter plots of SMPS aerosol volume concentration and AMS aerosol  
 181 volume concentration.]  
 182

183 The mass concentration changes between the PAM aerosol particles and the ambient  
 184 aerosol particles were determined for both the AMS and the SMPS (Figure S7-2). For  
 185 most of the data, the SMPS mass concentration difference is equal to or slightly greater  
 186 than the AMS mass concentration difference. However, there are also periods during  
 187 which the AMS mass concentration difference is much less than the SMPS mass  
 188 concentration difference. These discrepancies occur for days when the mass  
 189 concentrations are greatest in the organic-dominated period and the sulfate-dominated  
 190 period and thus do not depend on the origin of the aerosol particles. The reasons for  
 191 these discrepancies are under investigation, but they do not affect our conclusions.

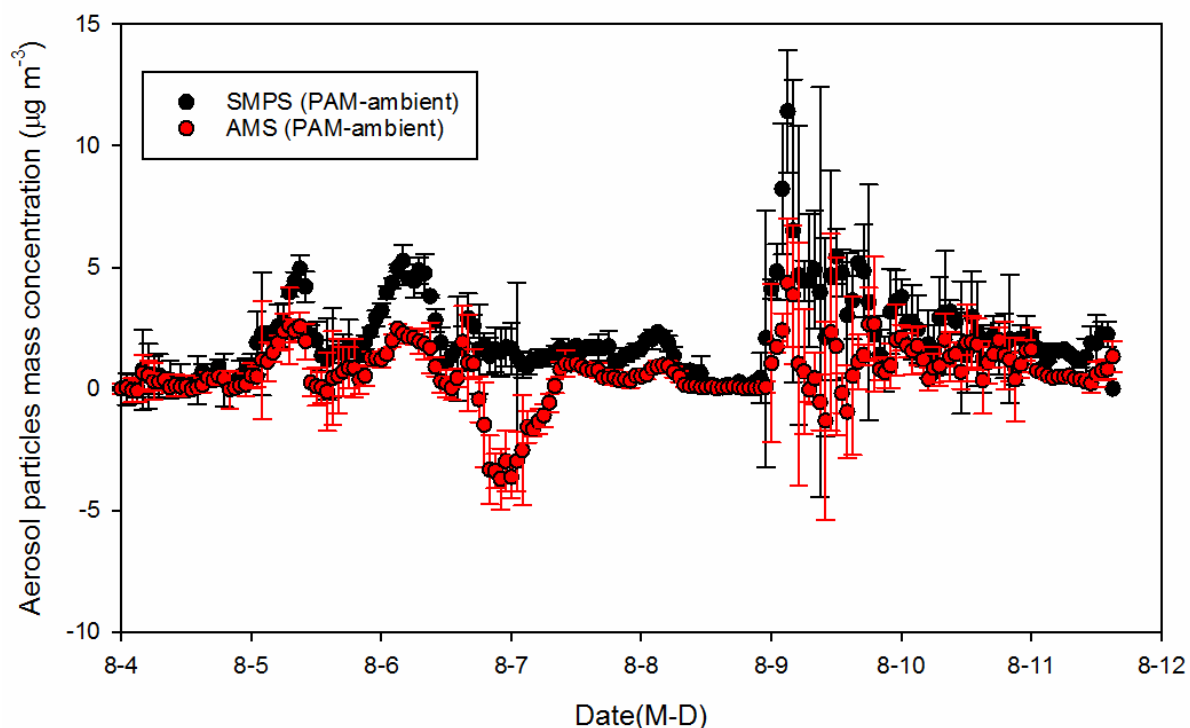

192 [Figure S7-2. The difference in mass concentrations between the PAM aerosol and  
 193 ambient aerosol measured by SMPS and AMS. Data are averages for 6 minutes with  $2\sigma$   
 194 confidence intervals.]  
 195

196  
 197 S8. Ammonium balance with sulfate and nitrate

198 We plotted the ammonium balance with sulfate and nitrate for ambient and PAM  
 199 observation for each episode. The chloride concentration was under  $0.4 \mu\text{g m}^{-3}$  which was  
 200 less than 1/10 of nitrate concentration, thus we only used sulfate and nitrate. The  
 201 inorganic aerosols were overall acidic, and the acidity in PAM aerosol was similar to  
 202 ambient aerosol in sulfate dominated episode. It is because of the sulfate enhancement  
 203 in sulfate dominated episode while nitrate in PAM reactor was depleted a lot than  
 204 ambient nitrate. In organics dominated episode, both of sulfate and ammonium was  
 205 enhanced in PAM reactor while nitrate was depleted. Thus, the acidity was rather  
 206 decreased in PAM reactor.

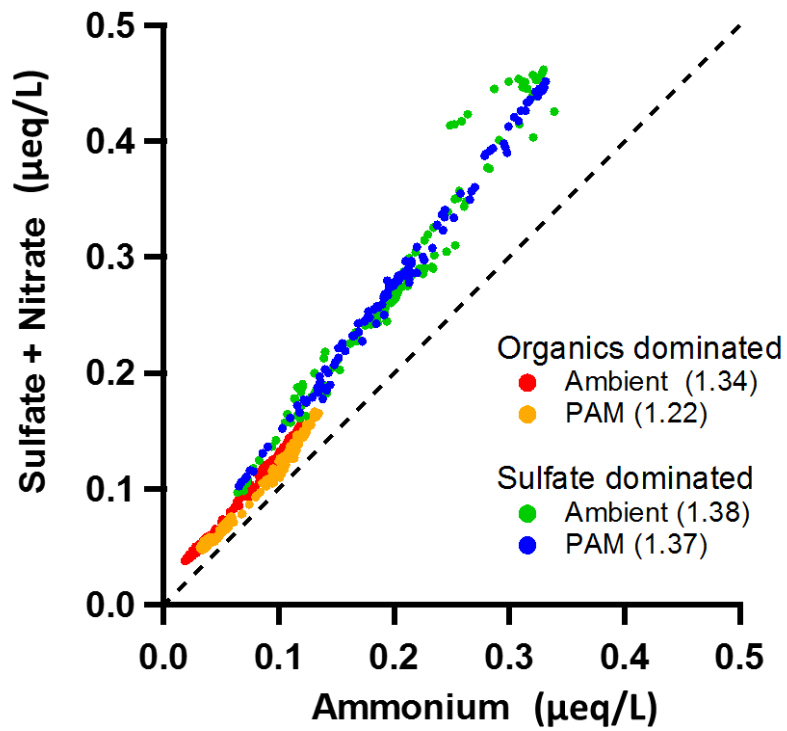

207

208 [Figure S8. The normality balance of ammonium with sulfate and nitrate in ambient and

209 PAM aerosol for organics dominated and sulfate dominated episodes. The numbers on

210 the figure legend were the acidity of aerosols obtained from

211  $[\text{sulfate} + \text{nitrate}] (\mu\text{eq/L}) / \text{ammonium} (\mu\text{eq/L})$ .

212

213

214

215

216

217

218

219

220

221 Figure S9. Ambient and PAM particle size distribution for organic-dominated and sulfate-  
222 dominated episode. The  $dN/d\log D_p$  ( $\# \text{ cm}^{-3}$ ) of particles smaller than 50 nm in diameter  
223 for organic-dominated episode was about an order of magnitude greater than that for  
224 sulfate-dominated episode.

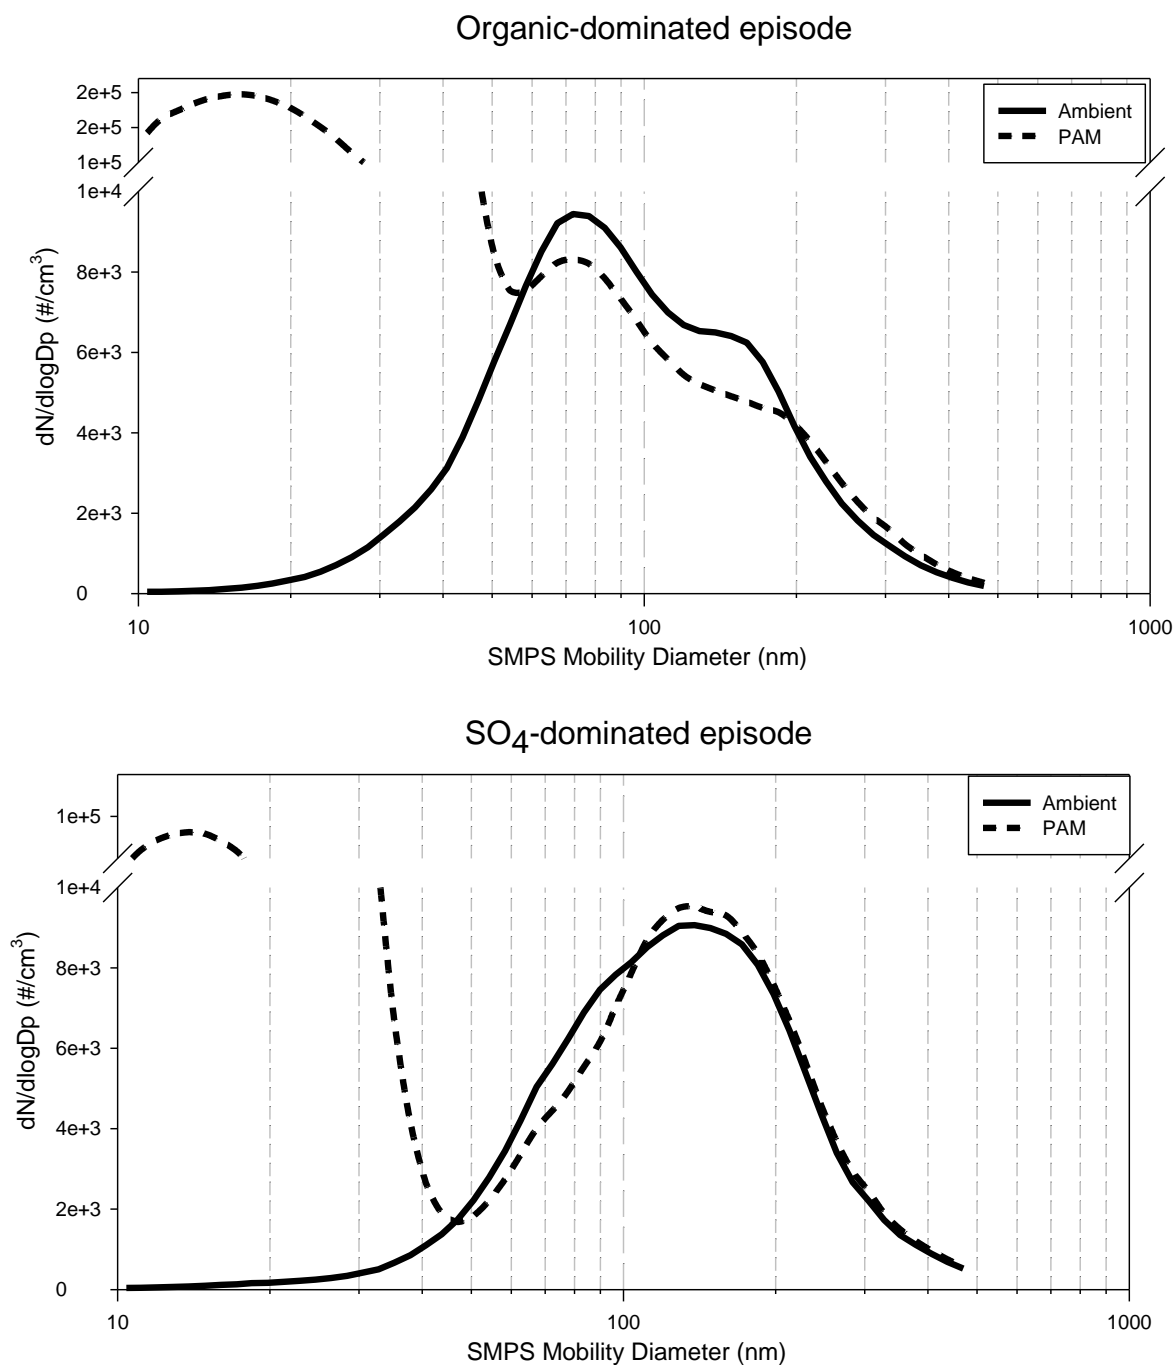

225

226 Salimi, F., Crilley, L. R., Stevanovic, S., Ristovski, Z., Mazaheri, M., He, C., Johnson, G., Ayoko,  
227 G., and Morawska, L.: Insights into the growth of newly formed particles in a subtropical  
228 urban environment, *Atmos. Chem. Phys.*, 15, 13475-13485, <https://doi.org/10.5194/acp->  
229 15-13475-2015, 2015.
